# Supplementary material
Source: Springer Nature journal article supplement (https://www.springermedizin.de/resource/supplementary/12883_2011_534_MOESM5_ESM.pdf/9455352)

Marker/Threshold

○

Pre-test

14-3-3

+

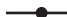

Post-test

*Tau* (pg/mL):

500

+

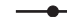

976

+

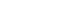

3000

+

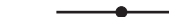

5000

+

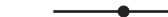

10000

+

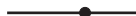

*S-100B* (ng/mL):

1.0

+

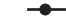

2.5

+



5.0

+

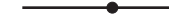

*S-100B* + *Tau*:

2.5 + 976

+

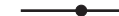

2.5 + 3000

+

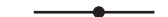

2.5 + 5000

+

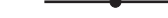

5.0 + 1000

+

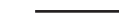

5.0 + 3000

+

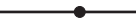

5.0 + 5000

+

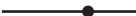

0 0.1 0.2 0.3 0.4 0.5 0.6 0.7 0.8 0.9 1.0

Probability of sCJD

Supplement: MOESM5 [file 9455352]
